# Supplementary material
Source: ML conference proceedings conference paper supplement (https://openaccess.thecvf.com/content/CVPR2024/html/Kolodiazhnyi_OneFormer3D_One_Transformer_CVPR_2024_paper.html)
Supplement: Supplementary file 1 [file Kolodiazhnyi_OneFormer3D_One_Transformer_CVPR_2024_supplemental.pdf]

# Appendix of OneFormer3D

Maxim Kolodiazhnyi, Anna Vorontsova, Anton Konushin, Danila Rukhovich  
Samsung Research

{m.kolodiazhn, a.vorontsova, a.konushin, d.rukhovich}@samsung.com

## A. Per-category Scores

Since segmentation tasks are severely imbalanced in terms of categories, an averaged score might shadow some crucial performance issues. To provide a complete picture, we report 3D panoptic segmentation scores on the ScanNet validation split and on the S3DIS Area-5 split in Tab. 1 and 2, respectively. Besides, per-category 3D instance segmentation scores on the ScanNet test split are listed in Tab. 3. Evidently, OneFormer3D segments every single category more precisely than competitors on the ScanNet validation split. Panoptic segmentation scores on S3DIS have never been reported so far, so we establish a baseline for future research. On the ScanNet test split, our method outperforms others in segmenting objects of 11 out of 18 categories.

## B. Performance

To provide a comprehensive overview of the proposed method, we also conduct a detailed performance analysis. Specifically, we decompose our method into several self-sufficient and replaceable components: creating super-points, extracting 3D features with a sparse 3D CNN, flexible pooling, and running a query decoder. We run a profiler to measure the time required for each component to proceed. Similarly, we identify components of competing approaches, and report the inference time component-wise in Tab. 4. The runtime is measured on the same RTX 3090 GPU. Compared with the SPFormer baseline, OneFormer3D processes a few additional queries for semantic segmentation, and uses another initialization strategy for instance queries. The computation overhead is though minor, causing a less than 3% increase of inference time. Overall, we can claim, that OneFormer3D is on par of SPFormer, which is the fastest among the profiled approaches.

## C. Qualitative Results

To give an intuition on how the segmentation scores relate to actual segmentation quality, we provide additional visualizations of original and segmented point clouds from the ScanNet (Fig. 1) and S3DIS (Fig. 2) datasets.

| Method                | PQ          | wall        | floor       | cabinet     | bed         | chair       | sofa        | table       | door        | window      | bkshf       | picture     | counter     | desk        | curtain     | fridge      | s. cur.     | toilet      | sink        | bath        | other       |
|-----------------------|-------------|-------------|-------------|-------------|-------------|-------------|-------------|-------------|-------------|-------------|-------------|-------------|-------------|-------------|-------------|-------------|-------------|-------------|-------------|-------------|-------------|
| SceneGraphFusion [12] | 31.5        | 67.6        | 25.4        | 13.9        | 22.2        | 47.2        | 10.5        | 16.4        | 12.6        | 26.4        | 56.4        | 22.9        | 31.3        | 28.0        | 38.3        | 38.0        | 32.3        | 34.8        | 63.2        | 30.4        | 11.7        |
| PanopticFusion [6]    | 33.5        | 40.4        | 76.4        | 23.8        | 35.8        | 46.7        | 42.1        | 34.8        | 18.0        | 19.3        | 16.4        | 26.4        | 10.4        | 16.1        | 16.6        | 39.5        | 36.3        | 76.1        | 36.7        | 31.0        | 27.7        |
| TUPPer-Map [14]       | 50.2        | 68.5        | 74.6        | 47.1        | 60.3        | 45.8        | 49.6        | 52.5        | 38.1        | 38.7        | 53.5        | 42.0        | 38.8        | 44.6        | 32.6        | 47.5        | 52.3        | 74.5        | 45.5        | 57.4        | 39.9        |
| <b>OneFormer3D</b>    | <b>71.2</b> | <b>78.9</b> | <b>94.9</b> | <b>60.9</b> | <b>80.4</b> | <b>88.8</b> | <b>74.4</b> | <b>74.4</b> | <b>61.5</b> | <b>58.9</b> | <b>55.2</b> | <b>57.1</b> | <b>55.8</b> | <b>65.7</b> | <b>62.5</b> | <b>63.3</b> | <b>71.7</b> | <b>95.9</b> | <b>73.7</b> | <b>85.5</b> | <b>65.2</b> |

Table 1. Per-class 3D panoptic segmentation PQ scores on the ScanNet validation split.

| Method      | PQ   | ceiling | floor | wall | beam | column | window | door | table | chair | sofa | b. case | board | clutter |
|-------------|------|---------|-------|------|------|--------|--------|------|-------|-------|------|---------|-------|---------|
| OneFormer3D | 62.2 | 92.0    | 96.5  | 81.5 | 0.0  | 40.9   | 66.2   | 81.4 | 43.9  | 87.0  | 48.5 | 46.0    | 81.3  | 43.9    |

Table 2. Per-class 3D panoptic segmentation PQ scores on the S3DIS Area-5 split.

| Method             | mAP <sub>50</sub> | bath | bed  | bkshf | cabinet | chair | counter | curtain | desk | door | other | picture | fridge | s. cur. | sink | sofa | table | toilet | window |
|--------------------|-------------------|------|------|-------|---------|-------|---------|---------|------|------|-------|---------|--------|---------|------|------|-------|--------|--------|
| NeuralBF [10]      | 55.5              | 66.7 | 89.6 | 84.3  | 51.7    | 75.1  | 2.9     | 51.9    | 41.4 | 43.9 | 46.5  | 0.0     | 48.4   | 85.7    | 28.7 | 69.3 | 65.1  | 100    | 48.5   |
| PointGroup [3]     | 63.6              | 100  | 76.5 | 62.4  | 50.5    | 79.7  | 11.6    | 69.6    | 38.4 | 44.1 | 55.9  | 47.6    | 59.6   | 100     | 66.6 | 75.6 | 55.6  | 99.7   | 51.3   |
| DyCo3D [2]         | 64.1              | 100  | 84.1 | 89.3  | 53.1    | 80.2  | 11.5    | 58.8    | 44.8 | 43.8 | 53.7  | 43.0    | 55.0   | 85.7    | 53.4 | 76.4 | 65.7  | 98.7   | 56.8   |
| SSTNet [5]         | 69.8              | 100  | 69.7 | 88.8  | 55.6    | 80.3  | 38.7    | 62.6    | 41.7 | 55.6 | 58.5  | 70.2    | 60.0   | 100     | 82.4 | 72.0 | 69.2  | 100    | 50.9   |
| H AIS [1]          | 69.9              | 100  | 84.9 | 82.0  | 67.5    | 80.8  | 27.9    | 75.7    | 46.5 | 51.7 | 59.6  | 55.9    | 60.0   | 100     | 65.4 | 76.7 | 67.6  | 99.4   | 56.0   |
| DKNet [13]         | 71.8              | 100  | 81.4 | 78.2  | 61.9    | 87.2  | 22.4    | 75.1    | 56.9 | 67.7 | 58.5  | 72.4    | 63.3   | 98.1    | 51.5 | 81.9 | 73.6  | 100    | 61.7   |
| TD3D [4]           | 75.1              | 100  | 77.4 | 86.7  | 62.1    | 93.4  | 40.4    | 70.6    | 81.2 | 60.5 | 63.3  | 62.6    | 69.0   | 100     | 64.0 | 82.0 | 77.7  | 100    | 61.2   |
| ISBNNet [7]        | 75.7              | 100  | 90.4 | 73.1  | 67.8    | 89.5  | 45.8    | 64.4    | 67.0 | 71.0 | 62.0  | 73.2    | 65.0   | 100     | 75.6 | 77.8 | 77.9  | 100    | 61.4   |
| SPFormer [9]       | 77.0              | 90.3 | 90.3 | 80.6  | 60.9    | 88.6  | 56.8    | 81.5    | 70.5 | 71.1 | 65.5  | 65.2    | 68.5   | 100     | 78.9 | 80.9 | 77.6  | 100    | 58.3   |
| Mask3D [8]         | 78.0              | 100  | 78.6 | 71.6  | 69.6    | 88.5  | 50.0    | 71.4    | 81.0 | 67.2 | 71.5  | 67.9    | 80.9   | 100     | 83.1 | 83.3 | 78.7  | 100    | 60.2   |
| <b>OneFormer3D</b> | <b>80.1</b>       | 100  | 97.3 | 90.9  | 69.8    | 92.8  | 58.2    | 66.8    | 68.5 | 78.0 | 68.7  | 69.8    | 70.2   | 100     | 79.4 | 90.0 | 78.4  | 98.6   | 63.5   |

Table 3. Per-class 3D instance segmentation mAP<sub>50</sub> scores on the ScanNet hidden test split at 17 Nov. 2023.

| Method                       | Component                 | Device  | Component time, ms | Total time, ms | mAP <sub>50</sub> |
|------------------------------|---------------------------|---------|--------------------|----------------|-------------------|
| PointGroup [3]               | Backbone                  | GPU     | 48                 | 372            | 56.7              |
|                              | Grouping                  | GPU+CPU | 218                |                |                   |
|                              | ScoreNet                  | GPU     | 106                |                |                   |
| SSTNet [5]                   | Superpoint extraction     | CPU     | 168                | 400            | 64.3              |
|                              | Backbone                  | GPU     | 26                 |                |                   |
|                              | Tree Network              | GPU+CPU | 148                |                |                   |
|                              | ScoreNet                  | GPU     | 58                 |                |                   |
| HAIS [1]                     | Backbone                  | GPU     | 50                 | 256            | 64.4              |
|                              | Hierarchical aggregation  | GPU+CPU | 116                |                |                   |
|                              | Intra-instance refinement | GPU     | 90                 |                |                   |
| SoftGroup [11]               | Backbone                  | GPU     | 48                 | 266            | 67.6              |
|                              | Soft grouping             | GPU+CPU | 121                |                |                   |
|                              | Top-down refinement       | GPU     | 97                 |                |                   |
| Mask3D [8]<br>w/o clustering | Backbone                  | GPU     | 106                | 221            | 73.0              |
|                              | Mask module               | GPU     | 100                |                |                   |
|                              | Query refinement          | GPU     | 15                 |                |                   |
| Mask3D [8]                   | Backbone                  | GPU     | 106                | 19851          | 73.7              |
|                              | Mask module               | GPU     | 100                |                |                   |
|                              | Query refinement          | GPU     | 15                 |                |                   |
|                              | DBSCAN clustering         | CPU     | 19630              |                |                   |
| SPFormer [9]                 | Superpoint extraction     | CPU     | 168                | 215            | 73.9              |
|                              | Backbone                  | GPU     | 26                 |                |                   |
|                              | Superpoint pooling        | GPU     | 4                  |                |                   |
|                              | Query decoder             | GPU     | 17                 |                |                   |
| <b>OneFormer3D</b>           | Superpoint extraction     | CPU     | 168                | 221            | 78.1              |
|                              | Backbone                  | GPU     | 26                 |                |                   |
|                              | Superpoint pooling        | GPU     | 4                  |                |                   |
|                              | Query decoder             | GPU     | 23                 |                |                   |

Table 4. The inference time and instance segmentation accuracy on the ScanNet validation split. We show comparable inference time to the fastest SPFormer [9], being significantly more accurate than all existing methods.

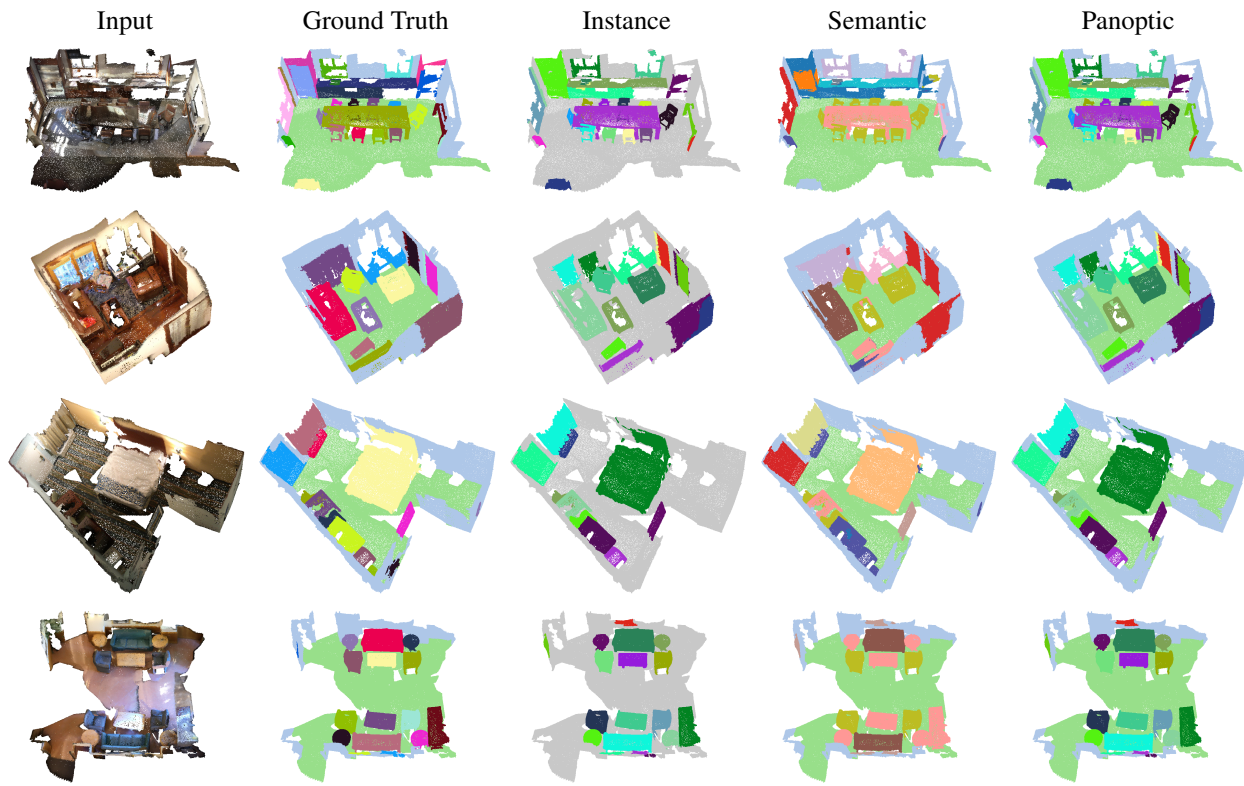

Figure 1. OneFormer3D predictions on ScanNet validation split. Left to right: an input point cloud, a ground truth panoptic mask, predicted 3D instance, 3D semantic, and 3D panoptic segmentation masks.

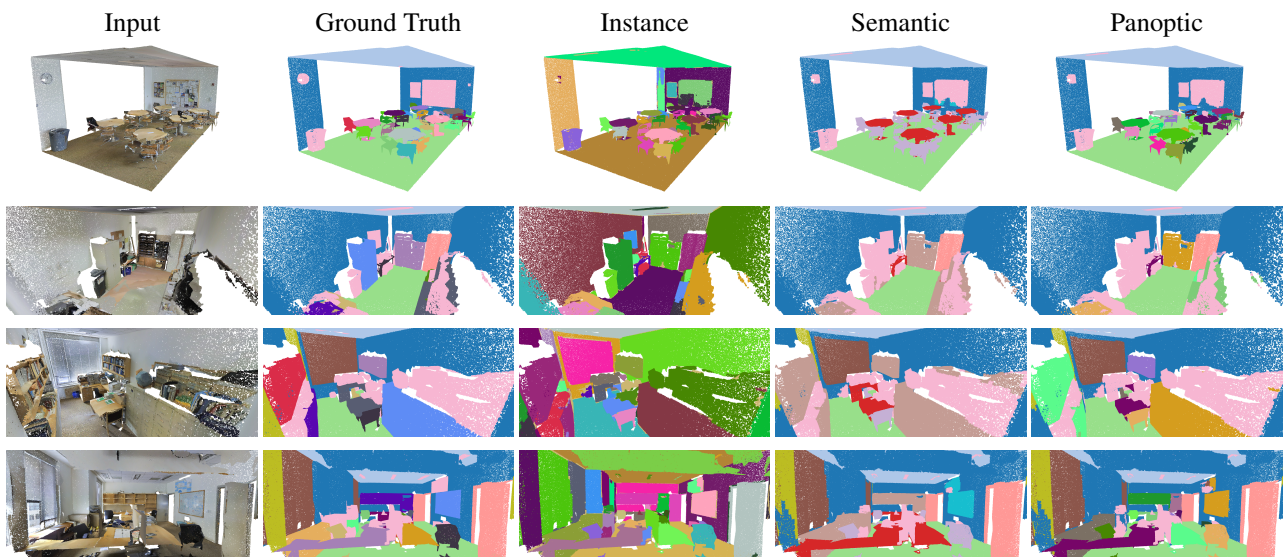

Figure 2. OneFormer3D predictions on the S3DIS Area-5 split. Left to right: an input point cloud, a ground truth panoptic mask, predicted 3D instance, 3D semantic, and 3D panoptic segmentation masks.



## References

- [1] Shaoyu Chen, Jiemin Fang, Qian Zhang, Wenyu Liu, and Xinggang Wang. Hierarchical aggregation for 3d instance segmentation. In *Proceedings of the IEEE/CVF International Conference on Computer Vision*, pages 15467–15476, 2021. 2, 3
- [2] Tong He, Chunhua Shen, and Anton Van Den Hengel. Dyco3d: Robust instance segmentation of 3d point clouds through dynamic convolution. In *Proceedings of the IEEE/CVF conference on computer vision and pattern recognition*, pages 354–363, 2021. 2
- [3] Li Jiang, Hengshuang Zhao, Shaoshuai Shi, Shu Liu, Chi-Wing Fu, and Jiaya Jia. Pointgroup: Dual-set point grouping for 3d instance segmentation. In *Proceedings of the IEEE/CVF conference on computer vision and Pattern recognition*, pages 4867–4876, 2020. 2, 3
- [4] Maksim Kolodiaznyi, Danila Rukhovich, Anna Vorontsova, and Anton Konushin. Top-down beats bottom-up in 3d instance segmentation. *arXiv preprint arXiv:2302.02871*, 2023. 2
- [5] Zhihao Liang, Zhihao Li, Songcen Xu, Mingkui Tan, and Kui Jia. Instance segmentation in 3d scenes using semantic superpoint tree networks. In *Proceedings of the IEEE/CVF International Conference on Computer Vision*, pages 2783–2792, 2021. 2, 3
- [6] Gaku Narita, Takashi Seno, Tomoya Ishikawa, and Yohsuke Kaji. Panopticfusion: Online volumetric semantic mapping at the level of stuff and things. In *2019 IEEE/RSJ International Conference on Intelligent Robots and Systems (IROS)*, pages 4205–4212. IEEE, 2019. 2
- [7] Tuan Duc Ngo, Binh-Son Hua, and Khoi Nguyen. Isbnet: a 3d point cloud instance segmentation network with instance-aware sampling and box-aware dynamic convolution. In *Proceedings of the IEEE/CVF Conference on Computer Vision and Pattern Recognition*, pages 13550–13559, 2023. 2
- [8] Jonas Schult, Francis Engelmann, Alexander Hermans, Or Litany, Siyu Tang, and Bastian Leibe. Mask3d: Mask transformer for 3d semantic instance segmentation. In *2023 IEEE International Conference on Robotics and Automation (ICRA)*, pages 8216–8223. IEEE, 2023. 2, 3
- [9] Jiahao Sun, Chunmei Qing, Junpeng Tan, and Xiangmin Xu. Superpoint transformer for 3d scene instance segmentation. In *Proceedings of the AAAI Conference on Artificial Intelligence*, pages 2393–2401, 2023. 2, 3
- [10] Weiwei Sun, Daniel Rebain, Renjie Liao, Vladimir Tankovich, Soroosh Yazdani, Kwang Moo Yi, and Andrea Tagliasacchi. Neuralbf: Neural bilateral filtering for top-down instance segmentation on point clouds. In *Proceedings of the IEEE/CVF Winter Conference on Applications of Computer Vision*, pages 551–560, 2023. 2
- [11] Thang Vu, Kookhoi Kim, Tung M Luu, Thanh Nguyen, and Chang D Yoo. Softgroup for 3d instance segmentation on point clouds. In *Proceedings of the IEEE/CVF Conference on Computer Vision and Pattern Recognition*, pages 2708–2717, 2022. 3
- [12] Shun-Cheng Wu, Johanna Wald, Keisuke Tateno, Nassir Navab, and Federico Tombari. Scenegraphfusion: Incremental 3d scene graph prediction from rgb-d sequences. In *Proceedings of the IEEE/CVF Conference on Computer Vision and Pattern Recognition*, pages 7515–7525, 2021. 2
- [13] Yizheng Wu, Min Shi, Shuaiyuan Du, Hao Lu, Zhiguo Cao, and Weicai Zhong. 3d instances as 1d kernels. In *European Conference on Computer Vision*, pages 235–252. Springer, 2022. 2
- [14] Zhiliu Yang and Chen Liu. Tupper-map: Temporal and unified panoptic perception for 3d metric-semantic mapping. In *2021 IEEE/RSJ International Conference on Intelligent Robots and Systems (IROS)*, pages 1094–1101. IEEE, 2021. 2
